# Supplementary material for: Identification of Candidate Gene for Internode Length in Rice to Enhance Resistance to Lodging Using QTL Analysis
Source: MDPI journal article supplement (doi:10.3390/plants10071369), 2021-07-05
Supplement: s1 [file s1]

**Table S1.** Analysis of the correlation between each internode length and stem diameter in the CNDH population.

| Year | Trait | LP      | LUI     | LSI     | LTI     | LFI     | LLI     | SDUI    | SDSI    | SDTI    | SDFI    | SDLI  |
|------|-------|---------|---------|---------|---------|---------|---------|---------|---------|---------|---------|-------|
| 2019 | LP    | 1.000   |         |         |         |         |         |         |         |         |         |       |
|      | LUI   | 0.559** | 1.000   |         |         |         |         |         |         |         |         |       |
|      | LSI   | 0.453** | 0.761** | 1.000   |         |         |         |         |         |         |         |       |
|      | LTI   | 0.301** | 0.635** | 0.793** | 1.000   |         |         |         |         |         |         |       |
|      | LFI   | 0.245** | 0.481** | 0.521** | 0.737** | 1.000   |         |         |         |         |         |       |
|      | LLI   | 0.309** | 0.392** | 0.465** | 0.561** | 0.674** | 1.000   |         |         |         |         |       |
|      | SDUI  | 0.350** | 0.137   | 0.266** | 0.209*  | 0.067   | -0.089  | 1.000   |         |         |         |       |
|      | SDSI  | 0.597** | 0.461** | 0.465** | 0.277** | 0.270** | 0.297** | 0.534** | 1.000   |         |         |       |
|      | SDTI  | 0.597** | 0.497** | 0.527** | 0.355** | 0.247** | 0.294** | 0.500** | 0.905** | 1.000   |         |       |
|      | SDFI  | 0.606** | 0.564** | 0.574** | 0.441** | 0.334** | 0.322** | 0.516** | 0.880** | 0.952** | 1.000   |       |
|      | SDLI  | 0.589** | 0.555** | 0.615** | 0.463** | 0.351** | 0.341** | 0.514** | 0.855** | 0.902** | 0.942** | 1.000 |
| 2020 | LP    | 1.000   |         |         |         |         |         |         |         |         |         |       |
|      | LUI   | 0.557** | 1.000   |         |         |         |         |         |         |         |         |       |
|      | LSI   | 0.434** | 0.736** | 1.000   |         |         |         |         |         |         |         |       |
|      | LTI   | 0.309** | 0.634** | 0.783** | 1.000   |         |         |         |         |         |         |       |
|      | LFI   | 0.218*  | 0.472** | 0.540** | 0.748** | 1.000   |         |         |         |         |         |       |
|      | LLI   | 0.296** | 0.398** | 0.487** | 0.548** | 0.653** | 1.000   |         |         |         |         |       |
|      | SDUI  | 0.333** | 0.140   | 0.241** | 0.194*  | 0.032   | -0.053  | 1.000   |         |         |         |       |
|      | SDSI  | 0.584** | 0.447** | 0.477** | 0.300** | 0.231*  | 0.328** | 0.527** | 1.000   |         |         |       |
|      | SDTI  | 0.553** | 0.490** | 0.553** | 0.427** | 0.251** | 0.309** | 0.503** | 0.902** | 1.000   |         |       |
|      | SDFI  | 0.587** | 0.571** | 0.613** | 0.513** | 0.369** | 0.393** | 0.505** | 0.858** | 0.933** | 1.000   |       |
|      | SDLI  | 0.573** | 0.626** | 0.644** | 0.587** | 0.505** | 0.545** | 0.410** | 0.822** | 0.866** | 0.949** | 1.000 |

\*\* Correlation is significant at the 0.01 level \* Correlation is significant at the 0.05 level. LP, length of the panicle; LUI, length of the uppermost internode; LSI, length of the second internode; LTI, length of the third internode; LFI, length of the fourth internode; LLI, length of the lowest internode; SDUI, stem diameter at the uppermost internode; SDSI, stem diameter at the second internode; SDTI, stem diameter at the third internode; SDFI, stem diameter at the fourth internode; SDLI, stem diameter at lowest internode.

**Table S2.** QTL related to each internode length and the stem diameter of each internode of the CNDH population

| Characteristics | Year | Locus   | Chromosome | Interval Markers <sup>a</sup> | LOD           | Add. Effect <sup>b</sup> | R <sup>2</sup> <sup>c</sup> | Increasing effect <sup>d</sup> |              |
|-----------------|------|---------|------------|-------------------------------|---------------|--------------------------|-----------------------------|--------------------------------|--------------|
| LP              | 2019 | qLP6    | 6          | RM528-RM3765                  | 3.64          | 0.87                     | 0.28                        | Cheongcheong                   |              |
|                 |      | qLP9    | 9          | RM3769-RM219                  | 2.66          | 0.89                     | 0.28                        | Cheongcheong                   |              |
|                 | 2020 | qLP6-1  | 6          | RM528-RM3765                  | 3.26          | 0.86                     | 0.26                        | Cheongcheong                   |              |
| LUI             | 2019 | qLUI1   | 1          | RM12285-RM212                 | 9.29          | 2.40                     | 0.53                        | Cheongcheong                   |              |
|                 |      | qLUI2   | 2          | RM13713-RM213                 | 3.33          | 1.46                     | 0.55                        | Cheongcheong                   |              |
|                 |      | qLUI5   | 5          | RM5311-RM4691                 | 3.59          | 1.62                     | 0.56                        | Cheongcheong                   |              |
|                 |      | qLUI6   | 6          | RM528-RM3765                  | 2.80          | 1.24                     | 0.55                        | Cheongcheong                   |              |
|                 | 2020 | qLUI1-1 | 1          | RM12285-RM212                 | 6.08          | 2.15                     | 0.49                        | Cheongcheong                   |              |
|                 |      | qLUI2-1 | 2          | RM13594-RM213                 | 3.52          | 1.61                     | 0.49                        | Cheongcheong                   |              |
|                 |      | qLUI5-1 | 5          | RM5311-RM4691                 | 3.52          | 1.76                     | 0.51                        | Cheongcheong                   |              |
|                 |      | qLUI6-1 | 6          | RM528-RM3765                  | 3.31          | 1.72                     | 0.49                        | Cheongcheong                   |              |
|                 | LSI  | 2019    | qLSI1      | 1                             | RM12285-RM212 | 14.63                    | 2.94                        | 0.54                           | Cheongcheong |
|                 |      |         | qLSI5      | 5                             | RM5311-RM4691 | 2.89                     | 1.10                        | 0.55                           | Cheongcheong |
| qLSI7           |      |         | 7          | RM20967-RM21972               | 4.09          | 1.29                     | 0.56                        | Cheongcheong                   |              |
| 2020            |      | qLSI1-1 | 1          | RM12285-RM212                 | 14.56         | 2.93                     | 0.56                        | Cheongcheong                   |              |
|                 |      | qLSI6   | 6          | RM50-RM20196                  | 5.36          | 1.52                     | 0.54                        | Cheongcheong                   |              |
|                 |      | qLSI6-1 | 6          | RM20632-RM345                 | 2.63          | 0.90                     | 0.59                        | Cheongcheong                   |              |
|                 |      | qLSI7-1 | 7          | RM418-RM21527                 | 3.15          | 1.08                     | 0.54                        | Cheongcheong                   |              |
| LTI             | 2019 | qLTI1   | 1          | RM12285-RM212                 | 15.17         | 2.26                     | 0.57                        | Cheongcheong                   |              |
|                 |      | qLTI6   | 6          | RM19621-RM20196               | 5.47          | 1.32                     | 0.61                        | Cheongcheong                   |              |

|      |      |           |    |                 |       |      |      |              |
|------|------|-----------|----|-----------------|-------|------|------|--------------|
| LFI  | 2020 | qLTI11    | 11 | RM27123-RM27161 | 3.38  | 1.13 | 0.59 | Cheongcheong |
|      |      | qLTI12    | 12 | RM247-RM1261    | 3.52  | 1.00 | 0.59 | Cheongcheong |
|      |      | qLTI1-1   | 1  | RM12285-RM212   | 13.80 | 2.36 | 0.57 | Cheongcheong |
|      |      | qLTI2     | 2  | RM13594-RM3512  | 3.02  | 1.06 | 0.57 | Cheongcheong |
|      |      | qLTI6-1   | 6  | RM50-RM20196    | 4.45  | 1.20 | 0.56 | Cheongcheong |
|      |      | qLTI6-2   | 6  | RM439-RM20318   | 3.65  | 1.52 | 0.65 | Cheongcheong |
|      | 2019 | qLFI1     | 1  | RM12285-RM212   | 7.35  | 1.80 | 0.42 | Cheongcheong |
|      |      | qLFI6     | 6  | RM20355-RM20632 | 5.00  | 1.57 | 0.44 | Cheongcheong |
|      |      | qLFI1-1   | 1  | RM12285-RM212   | 6.27  | 1.58 | 0.44 | Cheongcheong |
|      |      | qLFI6-1   | 6  | RM20355-RM20632 | 5.19  | 1.53 | 0.45 | Cheongcheong |
| LLI  | 2019 | qLLI1     | 1  | RM3482-RM212    | 2.92  | 0.71 | 0.44 | Cheongcheong |
|      |      | qLLI3     | 3  | RM14330-RM218   | 4.03  | 0.80 | 0.43 | Cheongcheong |
|      | 2020 | qLLI1-1   | 1  | RM12285-RM11849 | 3.65  | 0.77 | 0.36 | Cheongcheong |
|      |      | qLLI3-1   | 3  | RM14330-RM218   | 4.35  | 0.82 | 0.37 | Cheongcheong |
| SDUI | 2019 | qSDUI1    | 1  | RM1287-RM11194  | 3.98  | 0.16 | 0.30 | Cheongcheong |
|      |      | qSDUI11   | 11 | RM3428-RM26771  | 3.63  | 0.21 | 0.29 | Cheongcheong |
|      | 2020 | qSDUI1-1  | 1  | RM1287-RM11194  | 3.54  | 0.15 | 0.29 | Cheongcheong |
|      |      | qSDUI11-1 | 11 | RM287-RM27161   | 2.56  | 0.16 | 0.33 | Cheongcheong |
|      |      | qSDUI12   | 12 | RM12-RM247      | 3.20  | 0.28 | 0.69 | Cheongcheong |
| SDSI | 2019 | qSDSI1    | 1  | RM1297-RM14323  | 3.50  | 0.30 | 0.44 | Cheongcheong |
|      |      | qSDSI11   | 11 | RM6239-RM26771  | 3.46  | 0.24 | 0.31 | Cheongcheong |
|      | 2020 | qSDSI1-1  | 1  | RM1297-RM14323  | 2.69  | 0.23 | 0.35 | Cheongcheong |
|      |      | qSDSI11-1 | 11 | RM6239-RM26771  | 2.72  | 0.21 | 0.29 | Cheongcheong |

|      |      |           |    |                |      |      |      |              |
|------|------|-----------|----|----------------|------|------|------|--------------|
| SDTI | 2019 | qSDTI1    | 1  | RM1297-RM14323 | 5.84 | 0.36 | 0.44 | Cheongcheong |
|      |      | qSDTI8    | 8  | RM404-RM22861  | 3.08 | 0.21 | 0.33 | Cheongcheong |
|      |      | qSDTI11   | 11 | RM6239-RM26771 | 3.15 | 0.26 | 0.32 | Cheongcheong |
|      | 2020 | qSDTI1-1  | 1  | RM1194-RM5459  | 2.81 | 0.24 | 0.33 | Cheongcheong |
|      |      | qSDTI11-1 | 11 | RM6239-RM27242 | 5.35 | 0.39 | 0.39 | Cheongcheong |
| SDFI | 2019 | qSDFI1    | 1  | RM1297-RM14323 | 3.83 | 0.26 | 0.36 | Cheongcheong |
|      |      | qSDFI6    | 6  | RM345-RM3765   | 2.57 | 0.22 | 0.34 | Cheongcheong |
|      |      | qSDFI8    | 8  | RM404-RM22861  | 2.61 | 0.22 | 0.33 | Cheongcheong |
|      |      | qSDFI11   | 11 | RM6239-RM26771 | 3.85 | 0.30 | 0.34 | Cheongcheong |
|      | 2020 | qSDFI6-1  | 6  | RM20632-RM3765 | 2.86 | 0.23 | 0.35 | Cheongcheong |
|      |      | qSDFI11-1 | 11 | RM6239-RM26771 | 4.08 | 0.32 | 0.37 | Cheongcheong |
| SDLI | 2019 | qSDLI1    | 1  | RM1297-RM8111  | 2.86 | 0.25 | 0.36 | Cheongcheong |
|      |      | qSDLI2    | 2  | RM6-RM213      | 2.69 | 0.24 | 0.36 | Cheongcheong |
|      |      | qSDLI6    | 6  | RM528-RM3343   | 4.51 | 0.33 | 0.38 | Cheongcheong |
|      | 2020 | qSDLI1-1  | 1  | RM1297-RM8111  | 3.55 | 0.27 | 0.38 | Cheongcheong |
|      |      | qSDLI2-1  | 2  | RM13594-RM213  | 3.33 | 0.27 | 0.38 | Cheongcheong |
|      |      | qSDLI6-1  | 6  | RM528-RM3343   | 6.92 | 0.41 | 0.37 | Cheongcheong |

LP, length of the panicle; LUI, length of the uppermost internode; LSI, length of the second internode; LTI, length of the third internode; LFI, length of the fourth internode; LLI, length of the lowest internode; SDUI, stem diameter at the uppermost internode; SDSI, stem diameter at the second internode; SDTI, stem diameter at the third internode; SDFI, stem diameter at the fourth internode; SDLI, stem diameter at lowest internode; <sup>a</sup>Interval Marker are those within the significance threshold on each border of the QTL range. <sup>b</sup>Additive effect. <sup>c</sup>Phenotypic variation explains each QTL. <sup>d</sup>Increase allele is the source of the allele causing an increase in the measured trait.
